# Supplementary material for: Theoretical Study on the High HER/OER Electrocatalytic Activities of 2D GeSi, SnSi, and SnGe Monolayers and Further Improvement by Imposing Biaxial Strain or Doping Heteroatoms
Source: MDPI journal article supplement (doi:10.3390/molecules27165092), 2022-08-10
Supplement: s1 [file s1]

## Supplementary Information

# Theoretical Study on the High HER/OER Electrocatalytic Activities of 2D GeSi, SnSi and SnGe Monolayers and Further Improvement by Imposing Biaxial Strain or Doping Heteroatoms

Cuimei Li<sup>1</sup>, Guangtao Yu<sup>1, 2\*</sup>, Xiaopeng Shen<sup>3</sup>, Ying Li<sup>1\*</sup> and Wei Chen<sup>1, 2, 4\*</sup>

<sup>1</sup>*Laboratory of Theoretical and Computational Chemistry, Institute of Theoretical Chemistry, Jilin University, Changchun 130023, China*

<sup>2</sup>*Engineering Research Center of Industrial Biocatalysis, Fujian Province Higher Education Institutes, Fujian Provincial Key Laboratory of Advanced Materials Oriented Chemical Engineering, Fujian-Taiwan Science and Technology Cooperation Base of Biomedical Materials and Tissue Engineering, College of Chemistry and Materials Science, Fujian Normal University, Fuzhou 350007, China*

<sup>3</sup>*Department of Chemistry and Chemical Engineering, Institute of Micro and Nano Functional Materials, Yancheng Institute of Technology, Yancheng, Jiangsu 224051, China*

<sup>4</sup>*Fujian Provincial Key Laboratory of Theoretical and Computational Chemistry, Xiamen University, Xiamen, 361005, China*

\*Corresponding authors

E-mail: yugt@fjnu.edu.cn (G.T. Yu), liyingedu@jlu.edu.cn (Y. Li) and chenwei@fjnu.edu.cn (W. Chen)

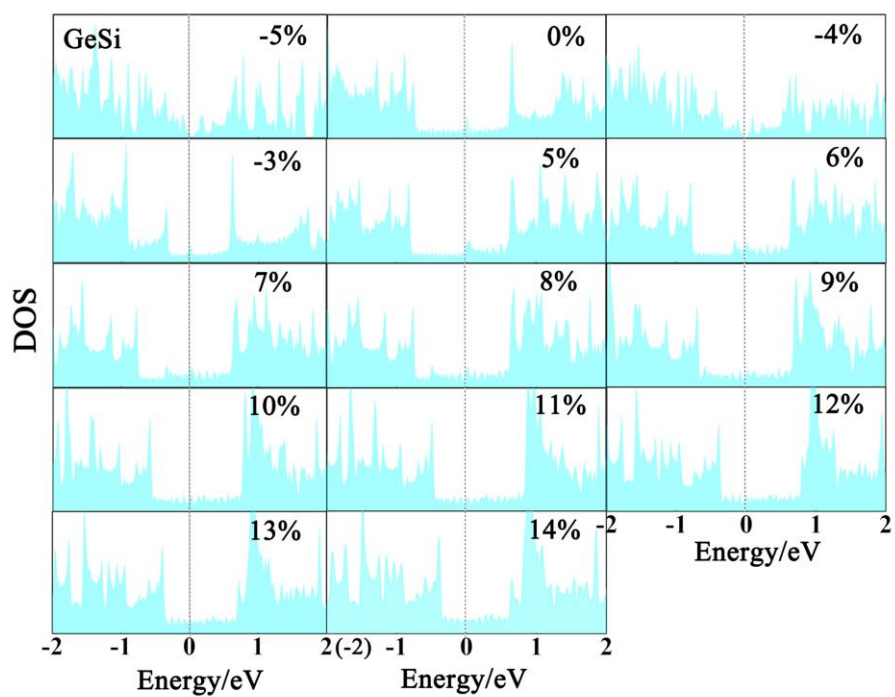

(a)

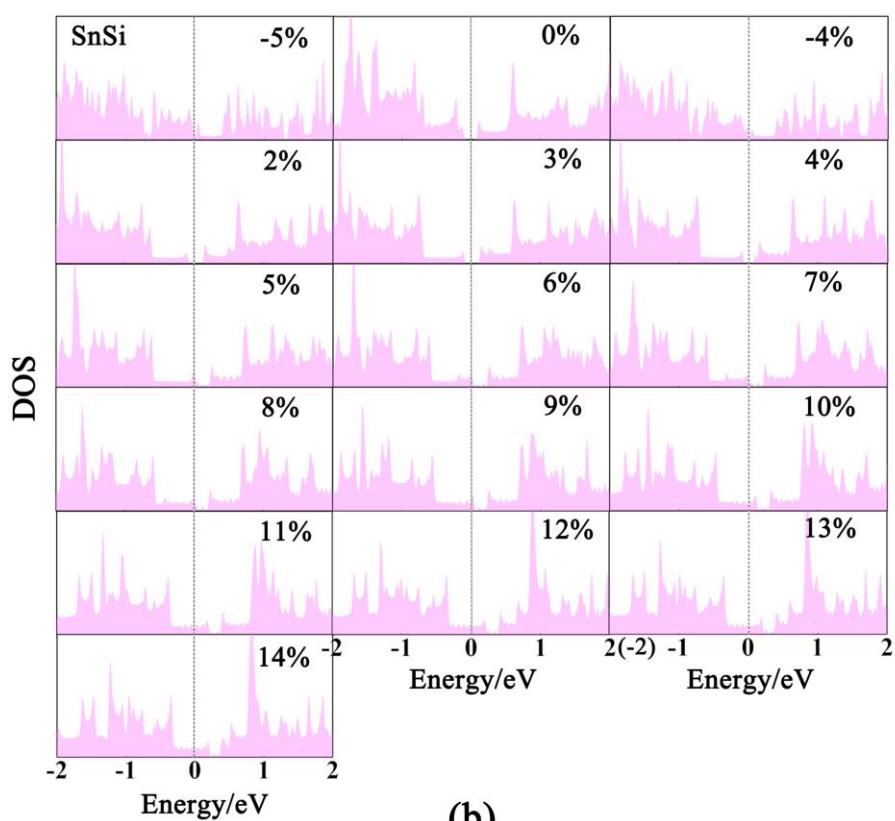

(b)

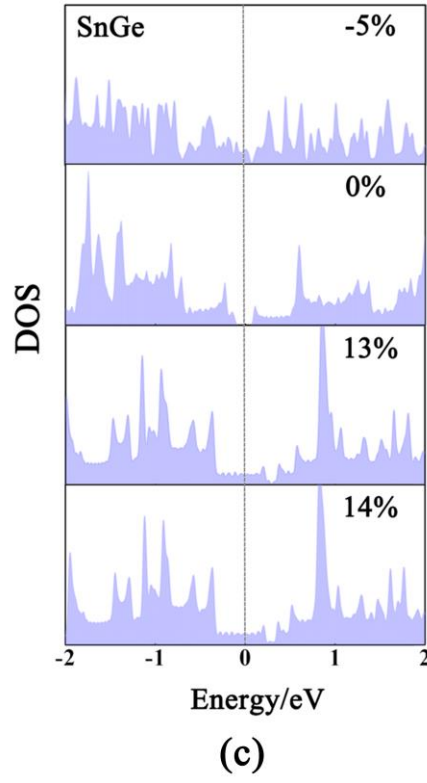

**Figure S1** The computed DOSs of GeSi (a), SnSi (b) and SnGe (c) under biaxial strains where the computed  $\Delta G_{H^*}$  values are ranging from -0.250 to 0.250 eV. For comparison, the computed DOSs of pristine GeSi, SnSi and SnGe monolayers are plotted.

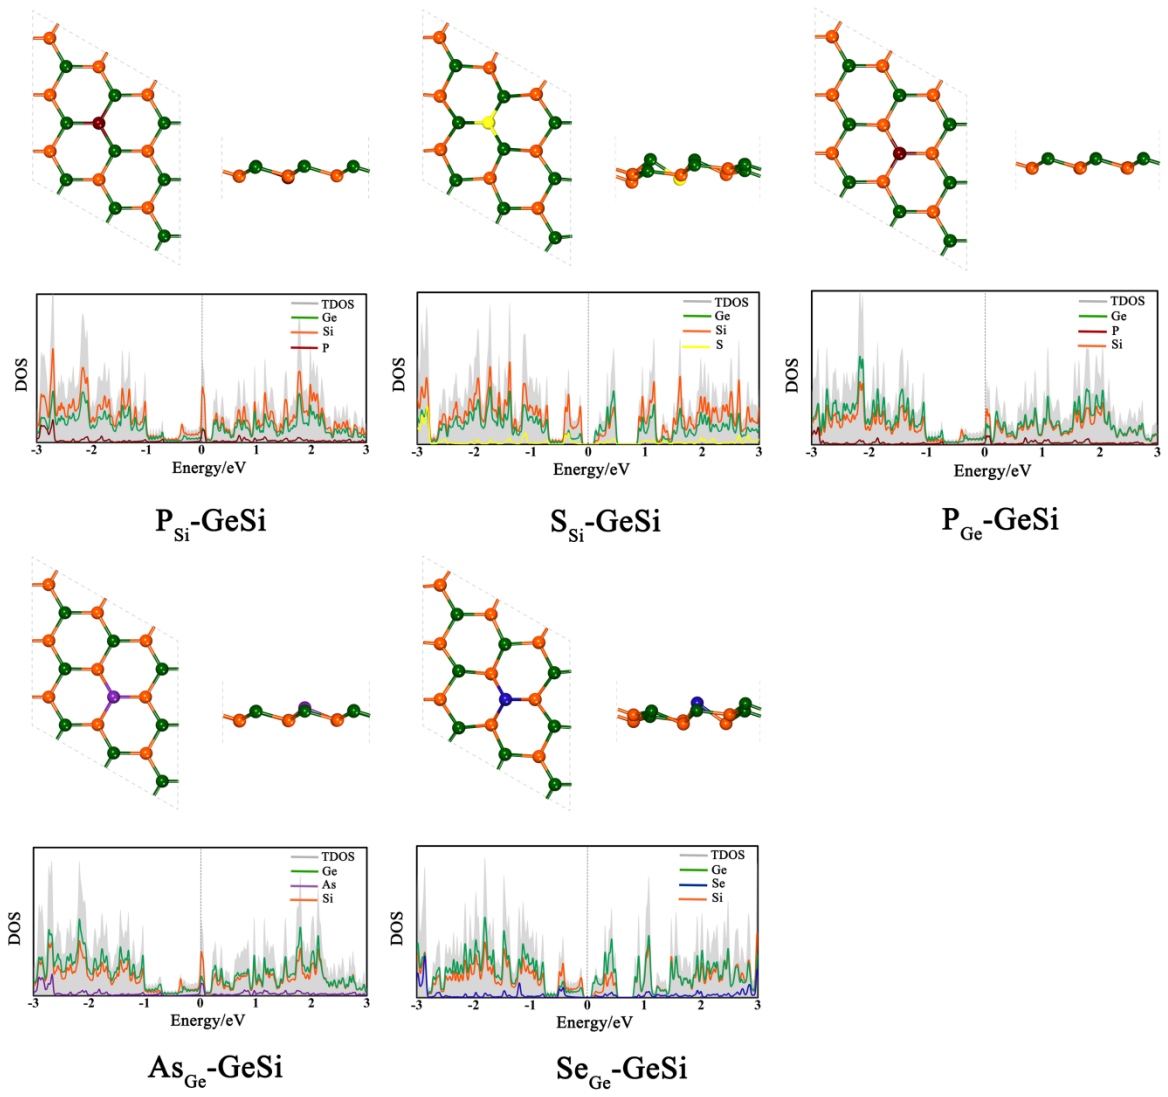

**Figure S2** The top and side views of the doped GeSi structures and the corresponding DOSs.

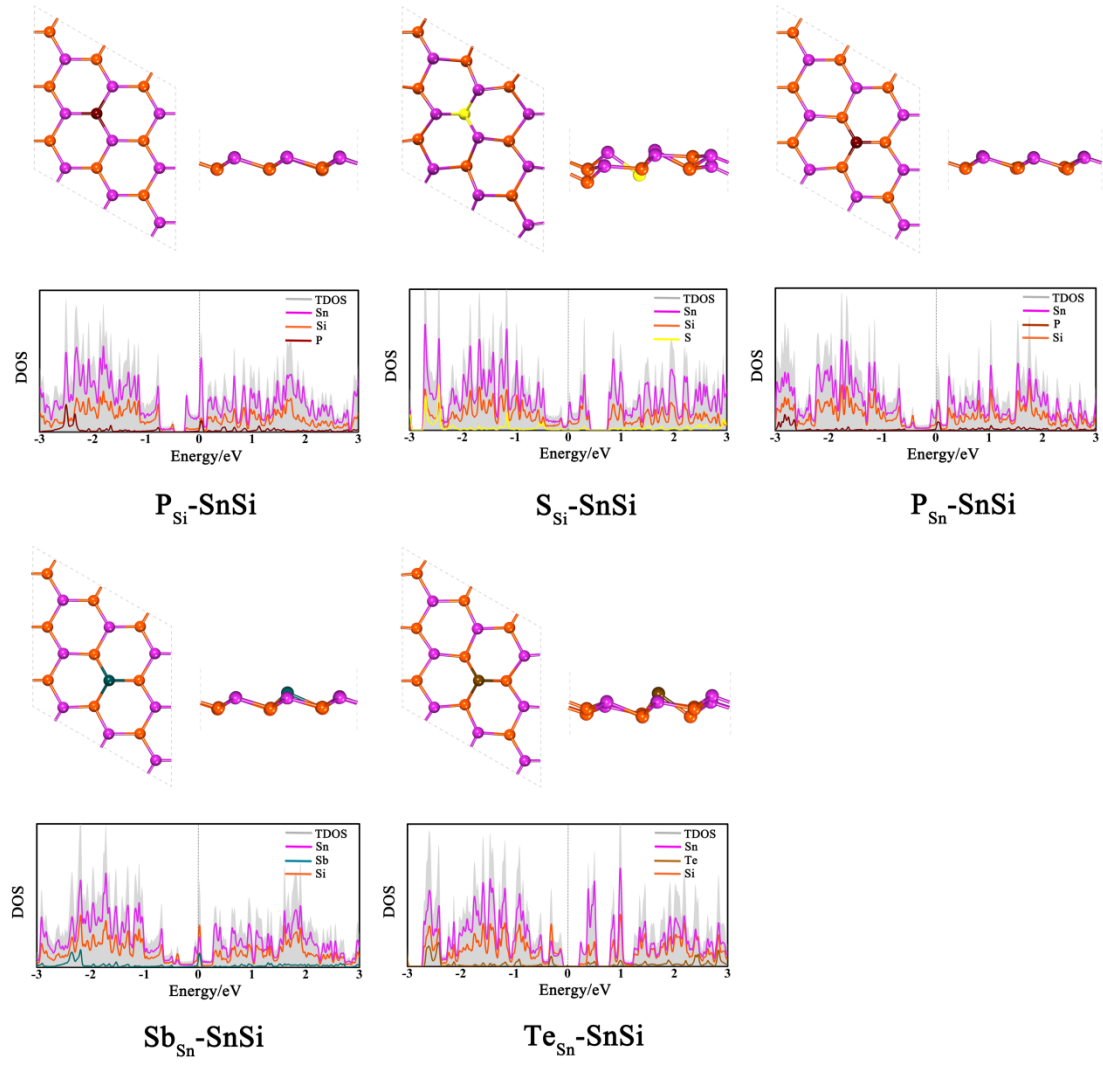

**Figure S3** The top and side views of the doped SnSi systems and the corresponding DOSs.

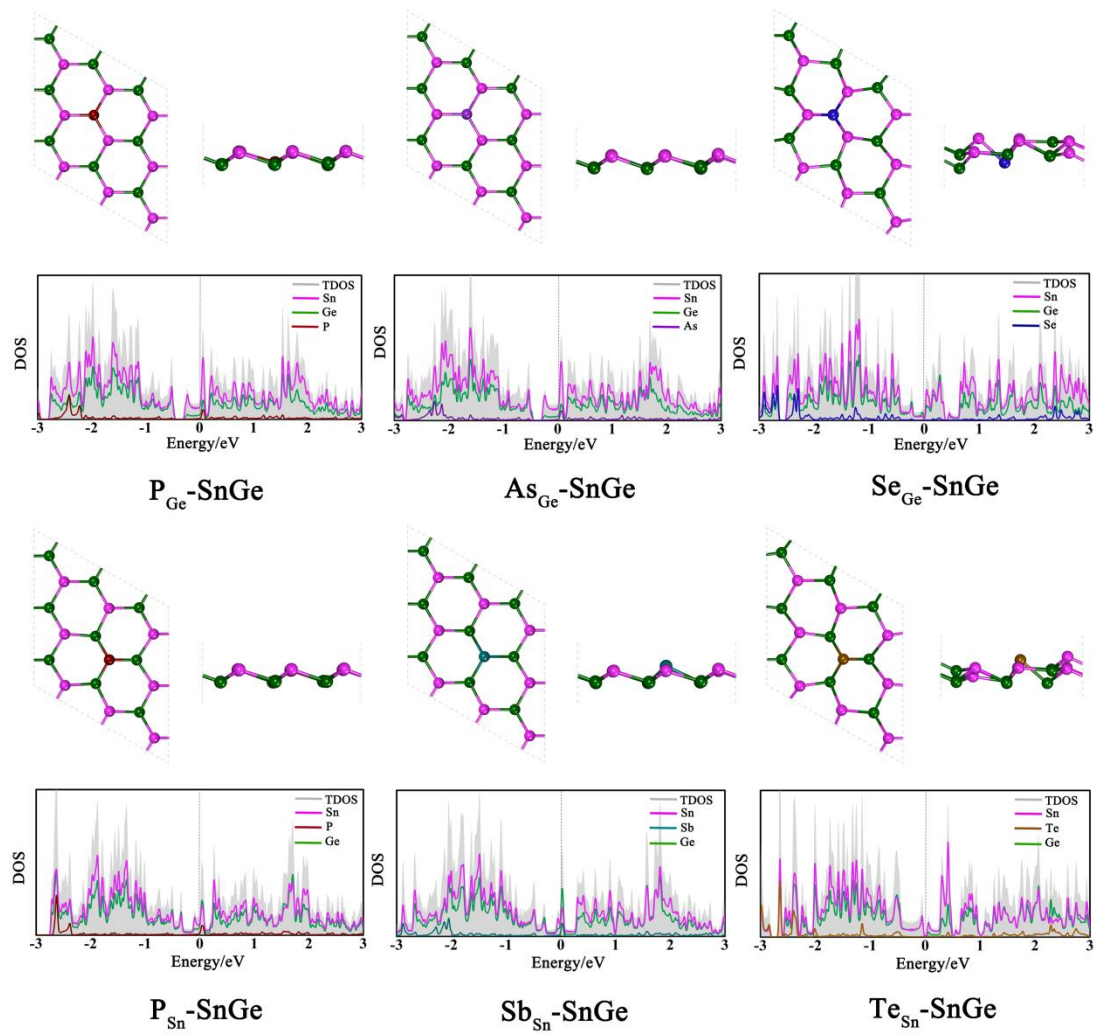

**Figure S4** The top and side views of the doped SnGe structures and the corresponding DOSs.

**Table S1** The space group, optimized lattice constant, the computed bond lengths  $d$  (Å), band gaps (eV) and elastic constants ( $\text{N.m}^{-1}$ ) for 2D GeSi, SnSi and SnGe systems.

| Systems | Space group | Lattice constant | $d$ (Å) | Band gaps (eV) | Elastic constants $C_{ij}$ , $\text{N.m}^{-1}$ |          |          |
|---------|-------------|------------------|---------|----------------|------------------------------------------------|----------|----------|
|         |             | $a = b$ (Å)      |         |                | $C_{11}$                                       | $C_{12}$ | $C_{44}$ |
| GeSi    | <i>P3M1</i> | 3.926            | 2.345   | Metallicity    | 59.41                                          | 17.71    | 20.92    |
| SnSi    | <i>P3M1</i> | 4.234            | 2.547   | 0.249          | 15.76                                          | 10.29    | 12.06    |
| SnGe    | <i>P3M1</i> | 4.305            | 2.610   | 0.213          | 31.58                                          | 17.05    | 8.10     |

**Table S2** The computed  $\Delta G_{H^*}$  (eV) values for  $H^*$  at the different adsorption sites ( $S_{ad}$ ) on the pristine GeSi, SnSi and SnGe systems.

| Systems  | $S_{ad}$ | $\Delta G_{H^*}$ (eV) |
|----------|----------|-----------------------|
| GeSi     | $T_{Ge}$ | 0.704                 |
|          | $T_{Si}$ | 0.332                 |
| SnSi     | $T_{Sn}$ | 0.826                 |
|          | $T_{Si}$ | 0.293                 |
| SnGe     | $T_{Sn}$ | 0.819                 |
|          | $T_{Ge}$ | 0.620                 |
| Graphene | $T_C$    | 1.804                 |



**Table S3** The computed  $\Delta G_{H^*}$  values at the  $T_{Ge}/T_{Si}$ ,  $T_{Sn}/T_{Si}$  and  $T_{Sn}/T_{Ge}$  sites, as a function of compressive and tensile biaxial strains for the 2D GeSi, SnSi and SnGe.

| Biaxial strain | GeSi, $\Delta G_{H^*}$ (eV) |          | SnSi, $\Delta G_{H^*}$ (eV) |          | SnGe, $\Delta G_{H^*}$ (eV) |          |
|----------------|-----------------------------|----------|-----------------------------|----------|-----------------------------|----------|
|                | $T_{Ge}$                    | $T_{Si}$ | $T_{Sn}$                    | $T_{Si}$ | $T_{Sn}$                    | $T_{Ge}$ |
| -5%            | 0.460                       | 0.084    | 0.631                       | -0.032   | 0.473                       | 0.033    |
| -4%            | 0.465                       | 0.107    | 0.692                       | 0.114    | 0.524                       | 0.337    |
| -3%            | 0.687                       | 0.250    | 0.698                       | 0.314    | 0.570                       | 0.462    |
| -2%            | 0.701                       | 0.330    | 0.817                       | 0.307    | 0.640                       | 0.652    |
| -1%            | 0.706                       | 0.329    | 0.838                       | 0.301    | 0.762                       | 0.641    |
| 1%             | 0.704                       | 0.321    | 0.836                       | 0.276    | 0.829                       | 0.621    |
| 2%             | 0.687                       | 0.306    | 0.814                       | 0.250    | 0.824                       | 0.599    |
| 3%             | 0.668                       | 0.287    | 0.807                       | 0.244    | 0.820                       | 0.576    |
| 4%             | 0.652                       | 0.273    | 0.793                       | 0.226    | 0.816                       | 0.561    |
| 5%             | 0.634                       | 0.250    | 0.783                       | 0.201    | 0.787                       | 0.537    |
| 6%             | 0.617                       | 0.249    | 0.767                       | 0.179    | 0.787                       | 0.527    |
| 7%             | 0.595                       | 0.228    | 0.762                       | 0.148    | 0.768                       | 0.498    |
| 8%             | 0.577                       | 0.204    | 0.745                       | 0.104    | 0.727                       | 0.456    |
| 9%             | 0.555                       | 0.184    | 0.720                       | 0.029    | 0.732                       | 0.388    |
| 10%            | 0.511                       | 0.112    | 0.709                       | -0.015   | 0.704                       | 0.344    |
| 11%            | 0.465                       | 0.067    | 0.658                       | -0.068   | 0.674                       | 0.300    |
| 12%            | 0.425                       | 0.030    | 0.647                       | -0.134   | 0.646                       | 0.262    |
| 13%            | 0.413                       | 0.008    | 0.628                       | -0.182   | 0.627                       | 0.228    |
| 14%            | 0.387                       | -0.054   | 0.617                       | -0.217   | 0.603                       | 0.183    |

**Table S4** The calculated band gaps for the GeSi, SnSi and SnGe as a function of compressive and tensile biaxial strains.

| Biaxial strain | GeSi, band gap<br>(eV) | SnSi, band gap<br>(eV) | SnGe, band gap<br>(eV) |
|----------------|------------------------|------------------------|------------------------|
| -5%            | 0.076                  | 0.049                  | Metallicity            |
| -4%            | Metallicity            | 0.057                  | 0.098                  |
| -3%            | Metallicity            | 0.223                  | 0.095                  |
| -2%            | Metallicity            | 0.241                  | 0.061                  |
| -1%            | Metallicity            | 0.258                  | 0.233                  |
| 0%             | Metallicity            | 0.231                  | 0.216                  |
| 1%             | Metallicity            | 0.251                  | 0.189                  |
| 2%             | Metallicity            | 0.233                  | 0.107                  |
| 3%             | Metallicity            | 0.241                  | 0.069                  |
| 4%             | Metallicity            | 0.173                  | Metallicity            |
| 5%             | Metallicity            | Metallicity            | Metallicity            |
| 6%             | Metallicity            | Metallicity            | Metallicity            |
| 7%             | Metallicity            | Metallicity            | Metallicity            |
| 8%             | Metallicity            | Metallicity            | Metallicity            |
| 9%             | Metallicity            | Metallicity            | Metallicity            |
| 10%            | Metallicity            | Metallicity            | Metallicity            |
| 11%            | Metallicity            | Metallicity            | Metallicity            |
| 12%            | Metallicity            | Metallicity            | Metallicity            |
| 13%            | Metallicity            | Metallicity            | Metallicity            |
| 14%            | Metallicity            | Metallicity            | Metallicity            |

**Table S5** The calculated  $\Delta G_{H^*}$  values for the different adsorption sites on the  $X_{Si}$ -GeSi and  $X_{Ge}$ -GeSi ( $X = P, S, As$  or  $Se$ ) systems. Refer to Figure 5a-b for the different adsorption sites ( $S_{ad}$ ).

| $S_{ad}$   | $\Delta G_{H^*}$ (eV) |                | $S_{ad}$   | $\Delta G_{H^*}$ (eV) |                 |                 |
|------------|-----------------------|----------------|------------|-----------------------|-----------------|-----------------|
|            | $P_{Si}$ -GeSi        | $S_{Si}$ -GeSi |            | $P_{Ge}$ -GeSi        | $As_{Ge}$ -GeSi | $Se_{Ge}$ -GeSi |
| $T_{X1}$   | -0.055                | 1.085          | $T_{X1}$   | 0.269                 | 0.541           | 1.563           |
| $T_{Si2}$  | -0.093                | 0.217          | $T_{Si2}$  | -0.044                | -0.021          | 0.273           |
| $T_{Si3}$  | -0.165                | 0.087          | $T_{Si3}$  | -0.039                | -0.014          | 0.276           |
| $T_{Si4}$  | -0.171                | 0.097          | $T_{Si4}$  | -0.307                | -0.327          | -0.138          |
| $T_{Si5}$  | -0.170                | 0.079          | $T_{Si5}$  | -0.157                | -0.139          | 0.209           |
| $T_{Si6}$  | -0.126                | 0.274          | $T_{Si6}$  | -0.301                | -0.334          | -0.137          |
| $T_{Ge7}$  | 0.121                 | 0.652          | $T_{Si7}$  | -0.151                | -0.136          | 0.213           |
| $T_{Ge8}$  | -0.051                | 0.285          | $T_{Ge8}$  | 0.405                 | 0.440           | 0.653           |
| $T_{Ge9}$  | -0.046                | 0.284          | $T_{Ge9}$  | 0.400                 | 0.409           | 0.520           |
| $T_{Ge10}$ | 0.120                 | 0.661          | $T_{Ge10}$ | 0.385                 | 0.410           | 0.520           |
| $T_{Ge11}$ | 0.240                 | 0.684          | $T_{Ge11}$ | 0.384                 | 0.405           | 0.369           |
| $T_{Ge12}$ | 0.239                 | 0.686          | $T_{Ge12}$ | 0.443                 | 0.494           | 0.635           |

**Table S6** The calculated  $\Delta G_{H^*}$  values for the different adsorption sites on the  $X_{Si}$ -SnSi and  $X_{Sn}$ -SnSi ( $X = P, S, Sb$  or  $Te$ ) systems. Refer to Figure 5c-d for the different adsorption sites ( $S_{ad}$ ).

| $S_{ad}$   | $\Delta G_{H^*}$ (eV) |                | $S_{ad}$   | $\Delta G_{H^*}$ (eV) |                 |                 |
|------------|-----------------------|----------------|------------|-----------------------|-----------------|-----------------|
|            | $P_{Si}$ -SnSi        | $S_{Si}$ -SnSi |            | $P_{Sn}$ -SnSi        | $Sb_{Sn}$ -SnSi | $Te_{Sn}$ -SnSi |
| $T_{X1}$   | 0.023                 | 0.853          | $T_{X1}$   | 0.223                 | 0.570           | 1.627           |
| $T_{Si2}$  | 0.069                 | 0.235          | $T_{Si2}$  | 0.063                 | 0.102           | ---             |
| $T_{Si3}$  | -0.067                | -0.011         | $T_{Si3}$  | 0.056                 | 0.105           | ---             |
| $T_{Si4}$  | -0.099                | -0.016         | $T_{Si4}$  | -0.231                | -0.284          | -0.013          |
| $T_{Si5}$  | -0.075                | -0.006         | $T_{Si5}$  | -0.101                | -0.081          | 0.198           |
| $T_{Si6}$  | 0.044                 | 0.170          | $T_{Si6}$  | -0.234                | -0.286          | -0.011          |
| $T_{Sn7}$  | 0.296                 | 0.785          | $T_{Si7}$  | -0.094                | -0.077          | 0.214           |
| $T_{Sn8}$  | 0.174                 | 0.441          | $T_{Sn8}$  | 0.491                 | 0.519           | 0.730           |
| $T_{Sn9}$  | 0.184                 | 0.445          | $T_{Sn9}$  | 0.491                 | 0.511           | 0.645           |
| $T_{Sn10}$ | 0.298                 | 0.786          | $T_{Sn10}$ | 0.483                 | 0.510           | 0.575           |
| $T_{Sn11}$ | 0.387                 | 0.704          | $T_{Sn11}$ | 0.486                 | 0.515           | 0.662           |
| $T_{Sn12}$ | 0.378                 | 0.719          | $T_{Sn12}$ | 0.508                 | 0.562           | ---             |

**Table S7** The calculated  $\Delta G_H^*$  values for the different adsorption sites on the  $X_{Ge}$ -SnGe and  $X_{Sn}$ -SnGe ( $X = P, As, Se, Sb$  or  $Te$ ) systems. Refer to Figure 5e-f for the different adsorption sites ( $S_{ad}$ ).

| $S_{ad}$   | $\Delta G_H^*$ (eV) |                 |                 | $S_{ad}$   | $\Delta G_H^*$ (eV) |                 |                 |
|------------|---------------------|-----------------|-----------------|------------|---------------------|-----------------|-----------------|
|            | $P_{Ge}$ -SnGe      | $As_{Ge}$ -SnGe | $Se_{Ge}$ -SnGe |            | $P_{Sn}$ -SnGe      | $Sb_{Sn}$ -SnGe | $Te_{Sn}$ -SnGe |
| $T_{X1}$   | 0.022               | 0.325           | 1.244           | $T_{X1}$   | 0.017               | 0.478           | 1.472           |
| $T_{Ge2}$  | 0.378               | 0.436           | 0.676           | $T_{Ge2}$  | 0.412               | 0.448           | 0.089           |
| $T_{Ge3}$  | 0.312               | 0.259           | 0.324           | $T_{Ge3}$  | 0.424               | 0.441           | 0.122           |
| $T_{Ge4}$  | 0.306               | 0.240           | 0.329           | $T_{Ge4}$  | 0.148               | 0.099           | 0.410           |
| $T_{Ge5}$  | 0.276               | 0.231           | 0.330           | $T_{Ge5}$  | 0.282               | 0.288           | -0.307          |
| $T_{Ge6}$  | 0.411               | 0.410           | 0.467           | $T_{Ge6}$  | 0.157               | 0.104           | 0.436           |
| $T_{Sn7}$  | 0.296               | 0.306           | 0.672           | $T_{Ge7}$  | 0.277               | 0.280           | -0.302          |
| $T_{Sn8}$  | 0.220               | 0.199           | 0.520           | $T_{Sn8}$  | 0.453               | 0.475           | 0.669           |
| $T_{Sn9}$  | 0.204               | 0.194           | 0.528           | $T_{Sn9}$  | 0.460               | 0.479           | 0.504           |
| $T_{Sn10}$ | 0.304               | 0.302           | ---             | $T_{Sn10}$ | 0.471               | 0.478           | 0.392           |
| $T_{Sn11}$ | 0.376               | 0.383           | 0.636           | $T_{Sn11}$ | 0.464               | 0.473           | 0.507           |
| $T_{Sn12}$ | 0.374               | 0.381           | 0.630           | $T_{Sn12}$ | 0.490               | 0.526           | 0.374           |
